# Supplementary material for: Exfoliation of borophenes from silver substrates assisted by Li/Mg atoms—a density functional theory study
Source: Royal Society of Chemistry journal article supplement (doi:10.1039/c8tc06598e), 2019-01-01
Supplement: c8tc06598e1.pdf [file c8tc06598e1.pdf]

## SUPPLEMENTARY MATERIAL

### Exfoliation of Borophene from Silver Substrate Assisted by

### Li/Mg Atoms—A Density Functional Theory Study

Yingping Wang,<sup>a</sup> Yuewen Mu<sup>\*a</sup>, and Si-Dian Li<sup>\*a</sup>

<sup>a</sup> Key Laboratory of Materials for Energy Conversion and Storage of Shanxi Province, Institute of Molecular Science, Shanxi University, Taiyuan 030006, China.

E-mail: [ywmu@sxu.edu.cn](mailto:ywmu@sxu.edu.cn) ; [lisidian@sxu.edu.cn](mailto:lisidian@sxu.edu.cn) .

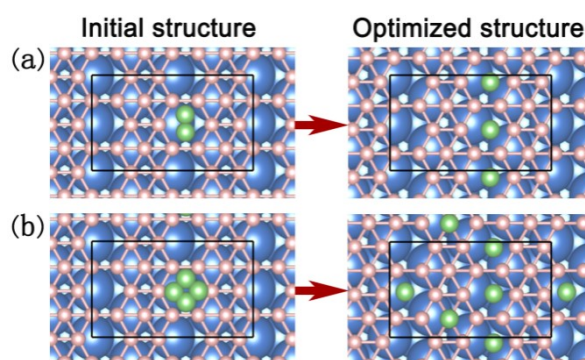

Figure S1. Illustration the optimization of (a) Li<sub>2</sub> and (b) Li<sub>4</sub> clusters on the borophene.

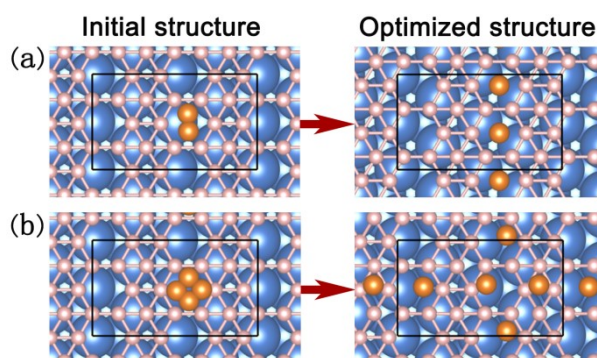

Figure S2. Illustration the optimization of (a) Mg<sub>2</sub> and (b) Mg<sub>4</sub> clusters on the borophene.

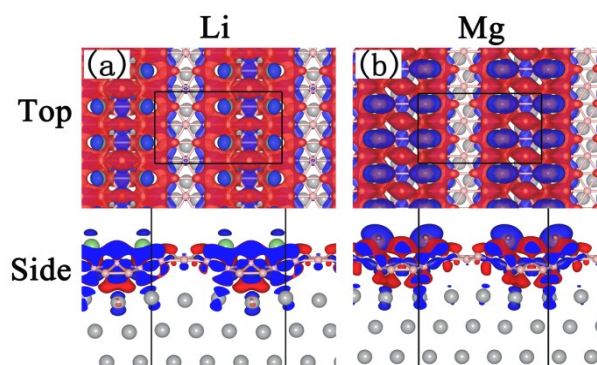

Figure S3. The top and side views of the charge density difference of  $\beta_{12}$  borophene with (a) Li and (b) Mg adatoms. The charge density difference was defined as  $\Delta\rho = \rho_{tot} - \rho_{borophene} - \rho_{sub} - \rho_{adatoms}$ , where  $\rho_{tot}$ ,  $\rho_{borophene}$ ,  $\rho_{sub}$  and  $\rho_{adatoms}$  stand for the charge density of total system, borophene, substrate and Li/Mg adatoms, respectively.
